# Supplementary material for: Salvianolic acid B protects against doxorubicin induced cardiac dysfunction via inhibition of ER stress mediated cardiomyocyte apoptosis
Source: Royal Society of Chemistry journal article supplement (doi:10.1039/c6tx00111d), 2016-01-01
Supplement: c6tx00111d1.pdf [file c6tx00111d1.pdf]

## **supplementary materials**

### **Animals and experimental protocols**

Male BALB/c mice (6-8 weeks old) used in our study were obtained from Vital River Laboratory Animal Technology (Beijing, China). The mice were maintained under standard environmental conditions (room temperature at  $25 \pm 1^\circ\text{C}$  and humidity of 60% with 12 h light/dark cycle). The mice were randomly divided into the following groups: (1) Control group: Mice in this group were injected intravenous (i.v.) with normal saline (solvent for DOX and Sal B); (2) DOX group: Mice in this group were treated with a single dose of DOX at 20 mg/kg i.p.; (3) Sal B (po)+ DOX groups: Mice in this three groups were treated with Sal B at a dose of 50, 100 and 200 mg/kg (po) every day respectively for one week followed by DOX at 20 mg/kg ip; (4) Sal B (ip)+ DOX groups: Mice in this three groups were treated with Sal B at a dose of 5, 10 and 20 mg/kg (ip) every day respectively for one week followed by DOX at 20 mg/kg ip; (5) Sal B (iv)+ DOX group: Mice in this group were treated with Sal B at a dose of 1, 2 and 4 mg/kg (iv) every day respectively for one week followed by DOX at 20 mg/kg ip.

Mice were euthanized 7 days after the DOX administration and serum was collected for analysis of the enzymatic activity of LDH, CK and AST by corresponding kit.

**Supplemental Table S1** Effects of Sal B on LDH, CK and AST activities.

|                            | Serum level of LDH<br>(U/L) | Serum level of AST<br>(U/L) | Serum level of CK<br>(U/L) |
|----------------------------|-----------------------------|-----------------------------|----------------------------|
| Cont                       | 353.44±43.87                | 20.33±3.22                  | 62.46±7.43                 |
| DOX                        | 908.27±67.37*               | 48.74±5.00*                 | 132.21±9.10*               |
| DOX+SalB 50<br>mg/kg (po)  | 893.32±60.54                | 49.95±4.59                  | 130.96±10.25               |
| DOX+SalB 100<br>mg/kg (po) | 823.26±48.26                | 43.57±5.73                  | 121.05±8.43                |
| DOX+SalB 200<br>mg/kg (po) | 831.27±58.97                | 42.28±4.65                  | 118.74±7.68                |
| DOX + SalB<br>5mg/kg (ip)  | 864.15±51.79                | 46.77±5.36                  | 131.07±6.35                |
| DOX + SalB<br>10mg/kg (ip) | 793.28±60.33                | 38.22±3.32#                 | 111.72±7.59                |
| DOX + SalB<br>20mg/kg (ip) | 804.55±45.74                | 38.59±4.01#                 | 109.53±9.22                |
| DOX + SalB<br>1mg/kg (iv)  | 842.15±48.27                | 45.52±4.77                  | 115.29±8.29                |
| DOX + SalB<br>2mg/kg (iv)  | 683.55±55.80#               | 30.01±2.30#                 | 94.20±8.40#                |
| DOX + SalB<br>4mg/kg (iv)  | 679.74±60.41#               | 29.87±4.31#                 | 93.22±6.36#                |

po: peros; ip: intraperitoneal injection; iv: intravenous injection. Data are means ± SD. \* P< 0.05 vs control group; # P< 0.05 vs DM group.
